# Supplementary material for: Enhancing mango shelf life through natural preservation: Investigating the efficacy of polysaccharide edible coating and leaf extracts
Source: PubMed Central journal article supplement — J Food Drug Anal. 2024 Sep 13;32(3):325–37. doi: 10.38212/2224-6614.3512 (PMC11464034; doi:10.38212/2224-6614.3512), 2024-09-13
Supplement: jfda-32-03-325-s001.pdf [file jfda-32-03-325-s001.pdf]

## *Research Highlights*

---

- Efficient *C. operculatus* extraction yields 17% polyphenols in dry material.
- *C. operculatus* extract has high polyphenol content & strong antioxidant properties.
- New edible coating formulation for preserving mangoes was achieved.
- Antioxidant properties of *C. operculatus* extract benefit mango in edible coating.
- The first evidence of *C. operculatus* extract's impact on an edible coating for mango.
